# Supplementary material for: Hypoxia regulates overall mRNA homeostasis by inducing Met1-linked linear ubiquitination of AGO2 in cancer cells
Source: PubMed Central journal article supplement (PMC8438024; doi:10.1038/s41467-021-25739-5), 2021-09-13
Supplement: 41467_2021_25739_MOESM10_ESM.pdf [file 41467_2021_25739_MOESM10_ESM.pdf]

## Reporting Summary

Nature Portfolio wishes to improve the reproducibility of the work that we publish. This form provides structure for consistency and transparency in reporting. For further information on Nature Portfolio policies, see our [Editorial Policies](#) and the [Editorial Policy Checklist](#).

### Statistics

For all statistical analyses, confirm that the following items are present in the figure legend, table legend, main text, or Methods section.

n/a Confirmed

- The exact sample size ( $n$ ) for each experimental group/condition, given as a discrete number and unit of measurement
- A statement on whether measurements were taken from distinct samples or whether the same sample was measured repeatedly
- The statistical test(s) used AND whether they are one- or two-sided  
*Only common tests should be described solely by name; describe more complex techniques in the Methods section.*
- A description of all covariates tested
- A description of any assumptions or corrections, such as tests of normality and adjustment for multiple comparisons
- A full description of the statistical parameters including central tendency (e.g. means) or other basic estimates (e.g. regression coefficient) AND variation (e.g. standard deviation) or associated estimates of uncertainty (e.g. confidence intervals)
- For null hypothesis testing, the test statistic (e.g.  $F$ ,  $t$ ,  $r$ ) with confidence intervals, effect sizes, degrees of freedom and  $P$  value noted  
*Give  $P$  values as exact values whenever suitable.*
- For Bayesian analysis, information on the choice of priors and Markov chain Monte Carlo settings
- For hierarchical and complex designs, identification of the appropriate level for tests and full reporting of outcomes
- Estimates of effect sizes (e.g. Cohen's  $d$ , Pearson's  $r$ ), indicating how they were calculated

*Our web collection on [statistics for biologists](#) contains articles on many of the points above.*

### Software and code

Policy information about [availability of computer code](#)

Data collection

GraphPad Prism 8 (<https://www.graphpad.com/scientific-software/prism/>)  
 SPSS 25.0 (<https://www.ibm.com/cn-zh/analytics/spss-statistics-software>)  
 Fiji/ImageJ (<https://imagej.net/Fiji>)  
 Cutadapt (version 1.9.3, <https://cutadapt.readthedocs.io/en/stable/#> )  
 bowtie2 software (version 2.2.4, <http://bowtie-bio.sourceforge.net/bowtie2/index.shtml> )  
 hisat2 software (version 2.0.4, <https://daehwankimlab.github.io/hisat2/> )  
 MACS2 software (version 1.4.3)  
 Novoalign software (version 3.02.12)

Data analysis

GraphPad Prism 8 and SPSS 25.0 were performed for statistical calculation. Pearson's R value for IF staining images and western blot image quantitation were performed by Fiji/ImageJ. RIP-seq, RNA-seq and miRNA-seq were followed the software documentations, no special changes.

For manuscripts utilizing custom algorithms or software that are central to the research but not yet described in published literature, software must be made available to editors and reviewers. We strongly encourage code deposition in a community repository (e.g. GitHub). See the Nature Portfolio [guidelines for submitting code & software](#) for further information.

## Data

Policy information about [availability of data](#)

All manuscripts must include a [data availability statement](#). This statement should provide the following information, where applicable:

- Accession codes, unique identifiers, or web links for publicly available datasets
- A description of any restrictions on data availability
- For clinical datasets or third party data, please ensure that the statement adheres to our [policy](#)

High-throughput sequencing data of RIP-Seq, RNA-Seq and miRNA-Seq were provided as EXCEL profiles in Supplementary Data and were deposited at the Gene Expression Omnibus (GEO) repository with the accession number GSE158601. The mass spectrometry data were provided as EXCEL profiles in Supplementary Data and uploaded to Integrated Proteome Resources (iProX) database with the accession number IPX0002506000. The remaining data supporting the findings of this paper are provided in the article. All data are also available from the corresponding author (J.Y. email: Jianxiu.Yu@gmail.com) upon reasonable request. Source analysis data are provided with this paper.

## Field-specific reporting

Please select the one below that is the best fit for your research. If you are not sure, read the appropriate sections before making your selection.

- Life sciences       Behavioural & social sciences       Ecological, evolutionary & environmental sciences

For a reference copy of the document with all sections, see [nature.com/documents/nr-reporting-summary-flat.pdf](https://www.nature.com/documents/nr-reporting-summary-flat.pdf)

## Life sciences study design

All studies must disclose on these points even when the disclosure is negative.

|                 |                                                                                                                                                                                                                                                              |
|-----------------|--------------------------------------------------------------------------------------------------------------------------------------------------------------------------------------------------------------------------------------------------------------|
| Sample size     | The experiments sample sizes in this study were chosen based on most studies with similar experimental procedures. At least three biological replicates of qRT-PCR and dual luciferase reporter assays were conducted and provided statistical significance. |
| Data exclusions | No data were excluded from analyses in the experiments.                                                                                                                                                                                                      |
| Replication     | All experiments of qRT-PCR, dual luciferase reporter assays, Western blot and northern blot were repeated at least three times and reliably reproduced.                                                                                                      |
| Randomization   | Molecular and cellular biology techniques were used in this study, which did not involve live organisms experiments, so there is no randomization techniques requirement.                                                                                    |
| Blinding        | The results of molecular and cell biology experiments obtained in this article were by using objective quantitative methods, so the staffs were not blinded to sample allocation during experiments and had no idea of expecting outcome.                    |

## Reporting for specific materials, systems and methods

We require information from authors about some types of materials, experimental systems and methods used in many studies. Here, indicate whether each material, system or method listed is relevant to your study. If you are not sure if a list item applies to your research, read the appropriate section before selecting a response.

### Materials & experimental systems

| n/a                                 | Involved in the study                                     |
|-------------------------------------|-----------------------------------------------------------|
| <input type="checkbox"/>            | <input checked="" type="checkbox"/> Antibodies            |
| <input type="checkbox"/>            | <input checked="" type="checkbox"/> Eukaryotic cell lines |
| <input checked="" type="checkbox"/> | <input type="checkbox"/> Palaeontology and archaeology    |
| <input checked="" type="checkbox"/> | <input type="checkbox"/> Animals and other organisms      |
| <input checked="" type="checkbox"/> | <input type="checkbox"/> Human research participants      |
| <input checked="" type="checkbox"/> | <input type="checkbox"/> Clinical data                    |
| <input checked="" type="checkbox"/> | <input type="checkbox"/> Dual use research of concern     |

### Methods

| n/a                                 | Involved in the study                           |
|-------------------------------------|-------------------------------------------------|
| <input checked="" type="checkbox"/> | <input type="checkbox"/> ChIP-seq               |
| <input checked="" type="checkbox"/> | <input type="checkbox"/> Flow cytometry         |
| <input checked="" type="checkbox"/> | <input type="checkbox"/> MRI-based neuroimaging |

## Antibodies

Antibodies used

Anti-AGO2, CST, Cat# 2897 (1:1000 dilution)  
 Anti-Myc, CST, Cat# 2276 (1:1000 dilution)  
 Anti-DICER, CST, Cat# 3363 (1:1000 dilution)  
 Anti-PTEN, CST, Cat# 9188 (1:1000 dilution)  
 Anti-GFP, CST, Cat# 2956 (1:200 dilution)

Anti-linear ubiquitin LUB9 clone, LifeSensors, Cat# AB130 (1:1000 dilution)  
 Anti-AGO2 11A9 clone, Millipore, Cat# MABE253 (1:1000 dilution)  
 Anti-linear ubiquitin 1E3 clone, Millipore, Cat# MABS199 (1:1000 dilution)  
 Anti-AGO2, Abcam, Cat# ab57113 (1:1000 dilution)  
 Anti-HOIL-1L, Abcam, Cat# ab38540 (1:1000 dilution)  
 Anti-TNRC6A, Abcam, Cat# ab84403 (1:50-1:100 dilution for immunofluorescence staining)  
 Anti-OTULIN, Abcam, Cat# ab151117 (1:1000 dilution)  
 Anti-DGCR8, Proteintech, Cat# 60084-1-Ig (1:1000 dilution)  
 Anti-TARBP2, Proteintech, Cat#15753-1-AP (1:1000 dilution)  
 Anti-His, Proteintech, Cat# 66005-1-Ig (1:1000 dilution)  
 Anti-GAPDH, Proteintech, Cat# 60004-1-Ig (1:5000 dilution)  
 Anti-Tubulin, Proteintech, Cat# 66031-1-Ig (1:5000 dilution)  
 Anti-SHARPIN, Proteintech, Cat# 14626-1-AP (1:1000 dilution)  
 Anti-HIF-1 $\alpha$ , NOVUSBIO, Cat# NB-100-479 (1:1000 dilution)  
 Anti-Flag, Sigma, Cat# F1804 (1:1000 dilution)  
 Anti-HA, Covance, Cat# A448-101L (1:1000 dilution)  
 Normal mouse IgG, Santa Cruz Biotechnology, Cat# sc-2025  
 Anti-TNRC6A, Santa Cruz Biotechnology, Cat# sc-56314 (1:500 dilution, 1:50-1:100 dilution for immunofluorescence staining)  
 Anti-HOIL-1L, Santa Cruz Biotechnology, Cat# sc-393754 (1:1000 dilution, 1:50-1:100 dilution for immunofluorescence staining)  
 Anti-GST, CwbioTech, Cat# CW0084 (1:3000 dilution)  
 Anti-HOIP, sigma-aldrich Cat# SAB2102031 (1:1000 dilution)

## Validation

All antibodies used in this study are commercially available and have been validated by manufacturer. Antibody validations and validation criteria are available on the following websites:

Anti-AGO2 [https://www.cellsignal.cn/products/primary-antibodies/argonaute-2-c34c6-rabbit-mab/2897?site-search-type=Products&N=4294956287&Ntt=2897&fromPage=plp&\\_requestid=3053072](https://www.cellsignal.cn/products/primary-antibodies/argonaute-2-c34c6-rabbit-mab/2897?site-search-type=Products&N=4294956287&Ntt=2897&fromPage=plp&_requestid=3053072)  
 Anti-Myc <https://www.cellsignal.cn/products/primary-antibodies/myc-tag-9b11-mouse-mab/2276?site-search-type=Products&N=4294956287&Ntt=2276&fromPage=plp>  
 Anti-DICER [https://www.cellsignal.cn/products/primary-antibodies/dicer-antibody/3363?site-search-type=Products&N=4294956287&Ntt=3363&fromPage=plp&\\_requestid=3078521](https://www.cellsignal.cn/products/primary-antibodies/dicer-antibody/3363?site-search-type=Products&N=4294956287&Ntt=3363&fromPage=plp&_requestid=3078521)  
 Anti-PTEN [https://www.cellsignal.cn/products/primary-antibodies/pten-d4-3-xp-rabbit-mab/9188?site-search-type=Products&N=4294956287&Ntt=9188&fromPage=plp&\\_requestid=3081892](https://www.cellsignal.cn/products/primary-antibodies/pten-d4-3-xp-rabbit-mab/9188?site-search-type=Products&N=4294956287&Ntt=9188&fromPage=plp&_requestid=3081892)  
 Anti-GFP [https://www.cellsignal.cn/products/primary-antibodies/gfp-d5-1-rabbit-mab/2956?site-search-type=Products&N=4294956287&Ntt=2956&fromPage=plp&\\_requestid=3081998](https://www.cellsignal.cn/products/primary-antibodies/gfp-d5-1-rabbit-mab/2956?site-search-type=Products&N=4294956287&Ntt=2956&fromPage=plp&_requestid=3081998)  
 Anti-linear ubiquitin LUB9 clone <https://lifesensors.com/product/ab130-linear-polyubiquitin-antibody-mab-clone-lub9/>  
 Anti-AGO2 11A9 clone [https://www.merckmillipore.com/CN/zh/product/Anti-Ago2-Antibody-clone-11A9,MM\\_NF-MABE253?bd=1#anchor\\_COA](https://www.merckmillipore.com/CN/zh/product/Anti-Ago2-Antibody-clone-11A9,MM_NF-MABE253?bd=1#anchor_COA)  
 Anti-linear ubiquitin 1E3 clone <https://www.sigmaaldrich.cn/CN/zh/product/mm/mabs199?context=product>  
 Anti-AGO2 <https://www.abcam.cn/argonaute-2-antibody-2e12-1c9-bsa-and-azide-free-ab57113.html>  
 Anti-HOIL-1L file: [file:///C:/Users/hailong%20Zhang/Downloads/datasheet\\_38540%20\(1\).pdf](file:///C:/Users/hailong%20Zhang/Downloads/datasheet_38540%20(1).pdf)  
 Anti-TNRC6A file: [file:///C:/Users/hailong%20Zhang/Downloads/datasheet\\_84403%20\(1\).pdf](file:///C:/Users/hailong%20Zhang/Downloads/datasheet_84403%20(1).pdf)  
 Anti-OTULIN <https://www.abcam.cn/otulin-antibody-ab151117.html>  
 Anti-DGCR8 <http://www.ptgcn.com/products/DGCR8-Antibody-60084-1-Ig.htm>  
 Anti-TARBP2 <http://www.ptgcn.com/products/TRBP-Antibody-15753-1-AP.htm>  
 Anti-His <http://www.ptgcn.com/products/His-Tag-Antibody-66005-1-Ig.htm>  
 Anti-GAPDH <http://www.ptgcn.com/products/GAPDH-Antibody-60004-1-Ig.htm>  
 Anti-Tubulin <http://www.ptgcn.com/products/tubulin-Alpha-Antibody-66031-1-Ig.htm>  
 Anti-SHARPIN <http://www.ptgcn.com/products/SHARPIN-Antibody-14626-1-AP.htm>  
 Anti-HIF-1 $\alpha$  [https://www.novusbio.com/products/hif-1-alpha-antibody-pack\\_nb100-905#supportresearch](https://www.novusbio.com/products/hif-1-alpha-antibody-pack_nb100-905#supportresearch)  
 Anti-Flag <https://www.sigmaaldrich.cn/CN/zh/product/sigma/f1804?context=product>  
 Anti-HA <https://www.biolegend.com/en-us/products/purified-anti-ha-11-epitope-tag-antibody-11374>  
 Normal mouse IgG <https://www.scbt.com/p/normal-mouse-igg?requestFrom=search>  
 Anti-TNRC6A <https://www.scbt.com/p/gw182-antibody-4b6?requestFrom=search>  
 Anti-HOIL-1L <https://www.scbt.com/p/rbck1-antibody-h-1?requestFrom=search>  
 Anti-GST <https://www.cwbio.com/goods/index/id/10104>  
 Anti-HOIP <https://www.sigmaaldrich.cn/CN/zh/product/sigma/sab2102031?context=product>

## Eukaryotic cell lines

Policy information about [cell lines](#)

### Cell line source(s)

HeLa, Stem Cell Bank, Chinese Academy of Sciences, Cat# TCHu187  
 H1299, Stem Cell Bank, Chinese Academy of Sciences, Cat# TCHu160  
 DU145, Stem Cell Bank, Chinese Academy of Sciences, Cat# TCHu222  
 HEK 293T, Stem Cell Bank, Chinese Academy of Sciences, Cat# GNHu17  
 A549, Stem Cell Bank, Chinese Academy of Sciences, Cat# TCHu150  
 PC3, Stem Cell Bank, Chinese Academy of Sciences, Cat# TCHu158  
 BPH1 cell was gotten from Prof. Simon W. Hayward of Vanderbilt University with MTA

### Authentication

HeLa, H1299, DU145, HEK 293T, A549 and PC3 were purchased from Stem Cell Bank (Chinese Academy of Sciences, Shanghai, China) of which cell lines have been thoroughly tested and authenticated. Each cell line used in this study were observed by microscope to check the shape, growth condition and any contaminants, cells growth and proliferation were in well condition.

Mycoplasma contamination

The cell lines used in this study were not tested for mycoplasma contamination. However, all the cell lines we used were treatment with mycoplasma removal agent (MP, cat# 093050044) to eliminate mycoplasma in this study.

Commonly misidentified lines  
(See [ICLAC](#) register)

None
